# Supplementary material for: Seasonal carbonate chemistry variability in marine surface waters of the US Pacific Northwest
Source: Copernicus journal article supplement (doi:10.5194/essd-10-1367-2018), 2018-07-30
Supplement: Supplementary file 1 [file essd-10-1367-2018-supplement.zip]

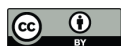

## *Supplement of*

# **Seasonal carbonate chemistry variability in marine surface waters of the US Pacific Northwest**

**Andrea J. Fassbender et al.**

*Correspondence to:* Andrea J. Fassbender ([fassbender@mbari.org](mailto:fassbender@mbari.org))

- [essd-10-1367-2018-supplement-title-page.pdf](#)
- [WA\\_mooring\\_seasonal\\_cycles.nc](#)
- [WA\\_region\\_seasonal\\_cycles.nc](#)

The copyright of individual parts of the supplement might differ from the CC BY 4.0 License.
